# Supplementary material
Source: publisher figshare collection journal article supplement (https://asha.figshare.com/articles/dataset/_/28474172)
Supplement: Supplementary file 2 [file 1]

**Supplemental Material S1.** AUC values for random forest models with various window sizes, target word excluded.

|                                                  | Window of words around target word included in analysis; target word not included |            |        |       |               |              |                     |
|--------------------------------------------------|-----------------------------------------------------------------------------------|------------|--------|-------|---------------|--------------|---------------------|
| Model                                            | -4, -3, -2, -1                                                                    | -3, -2, -1 | -2, -1 | -1, 1 | -3, -2, -1, 1 | -2, -1, 1, 2 | -3, -2, -1, 1, 2, 3 |
| Random forest model with maximum depth of 8      | 0.725                                                                             | 0.726      | 0.729  | 0.744 | 0.741         | 0.743        | 0.745               |
| Random forest model with unlimited maximum depth | 0.704                                                                             | 0.704      | 0.703  | 0.737 | 0.735         | 0.739        | 0.737               |

*Notes.* The target word is 0. The word before the target word is -1, and the word after the target word is 1.
